# Supplementary material for: Dissociation of the nuclear basket triggers chromosome loss in aging yeast
Source: eLife. 2025 Oct 30;14:RP104530. doi: 10.7554/eLife.104530 (PMC12574999; doi:10.7554/eLife.104530)
Supplement: Source data 1. [file elife-104530-data1.xlsx]

## Sheet: Figure 1
Figure 1C		0h	24h
	Chr II-TetO(GFP)	Chr II-TetO(mCherry)	Chr IV-TetO(RFP)	Chr II&IV-TetO(GFP)	Plasmid(Ubi-GFP)	Plasmid(TetO-TetR-GFP)
	0	0	0.0125	0
	0	0	0.0128205	0
	0	0	0	0
	0	0		0
	0			0
	0.02			0
	Chr II-TetO(GFP)	Chr II-TetO(mCherry)	ChrIV-TetO(RFP)	Chr II&IV-TetO(GFP)	Plasmid(Ubi-GFP)	Plasmid(TetO-TetR-GFP)
	0.086957	0.09434	0.125	0.06	0.244	0.243056
	0.073171	0.096154	0.1875	0.06	0.11	0.325397
	0.12	0.111111	0.158537	0.06	0.26	0.164948
	0.075472	0.08		0.06	0.283
	0.051724			0.02	0.288
	0.163636			0.02	0.175

## Sheet: Figure1-supplement1
		Fig S1B
		0h wt	0h 3xΔi	12h wt	12h 3xΔi	24h wt	24h 3xΔi
		0	0	0	0	0.058	0.04
		0	0	0.04	0	0.05	0.02
		0	0	0	0	0.025	0.08
		0	0	0.02	0.02	0.046	0.02
		0	0	0	0.02	0.022	0.04
		0	0	0	0.02	0.023	0.022
		0	0	0	0	0.044	0.065
		0	0	0	0	0.025	0.043
		0	0	0	0.02	0	0.04

## Sheet: Figure 2
		Figure 2A							Figure 2C					Figure 2E
		Chr IV-TetO	Chr II-TetO	Plasmid-TetO	Chr IV-TetO	Chr II-TetO	Plasmid-TetO		Mother	Bud					Old SPB			New SPB
		0	0	0.009009	0.069767	0.087	0.232558		0	1				Plasmid-TetO	0.8	0.866667	1	0.2	0.133333	0
		0	0	0.022222	0.162791	0.156	0.37037		0.18	0.82				ChrII-TetO	1	0.78	0.95	0	0.22	0.05
		0	0	0	0.204545	0.04	0.282051		0.27	0.73				ChrII-TetO-Inverted SPB	0.63	0.89	0.89	0.37	0.11	0.11
			0			0.0615			0.45	0.55
			0			0.0615			0.18	0.82
			0			0.123			0	1
		Figure 2F
		wt	Ipl1-321	wt	Ipl1-321	wt	Ipl1-321
		0	0	0	0.1	0.147	0.166
		0	0	0.02	0.06	0.121	0.066
		0	0	0	0.04	0.071	0.0952
		0	0	0	0.1	0.09	0.0857
		0	0	0	0.04	0.0444	0.0731
		0	0	0	0.12	0.071	0.033

## Sheet: Figure2-supplement1
		Fig S2A							Fig S2B
				Replicative divisions
			wt	ΔiGlc7	Ipl1-321	ΔiGlc7 + Ipl1-321			wt	Ipl1-321	Ipl1-321 GLC7/MCM21/NBL1-ΔiΔiΔi	wt	Ipl1-321	Ipl1-321 GLC7/MCM21/NBL1-ΔiΔiΔi	wt	Ipl1-321	Ipl1-321 GLC7/MCM21/NBL1-ΔiΔiΔi
			15	30	7	24			0	0	0	0	0.1	0	0.147	0.166	0.0416
			22	12	15	28			0	0	0	0.02	0.06	0.02	0.121	0.066	0.0408
			14	16	18	38			0	0	0	0	0.04	0	0.071	0.0952	0.02
			26	26	8	22			0	0	0	0	0.1	0.02	0.09	0.0857	0.0444
			19	14	17	16			0	0	0	0	0.04	0.02	0.0444	0.0731	0.0212
			25	28	16	9			0	0	0	0	0.12	0	0.071	0.033	0
			33	28	21	14
			21	27	22	13
			26	25	23	26
			23	32	20	27
			22	27	17	29
			32	25	17	41
			19	11	16	23
			13	18	26	19
			25	34	21	29
			29	41	20	12
			19	35	18	26
			12	15	11	4
			6	26	12	25
			31	16	3	20
			23	8	13	24
			30	36	18	18
			22	19	15	28
			17	17	21	14
			20	18	15	14
			12	27	10	13
			30	25	19	16
			16	17	25	36
			18	31	26	25
			27	28	10	15
			31	26	17	15
			21	24	16	26
			17	18	8	30
			32	26	16	25
			16	18	17	29
			15	8	23	23
			17	23	15	22
			7	20	27	15
			14	31	24	22
			5	22	22	18
			32	38	8	23
			30	41	10	28
			26	8	20	13
			25	13	19	21
			16	7	25	16
			35	19	5	22
			21	20	17	34
			22	24	9	30
			23	35	15	11
			27	19	13	8
			14	30		19
			23	27		20
			20	23		9
			25	19		24
			15	34		16
			26	27		36
			16	30		21
			27	14		16
			40	35		23
			4	32		21
			16	34		27
			25	33		24
			9	28		22
			22	27		16
			30	25		24
			29	15		31
			12	26		25
			24	27		30
			15	13		22
			30	28		28
			14	37		20
			26	26		34
			15	36		33
			12	24		18
			35	28		17

## Sheet: Figure 3
				Figure 3A
				Categories	wt					sir2Δ					fob1Δ					sgf73Δ					mlp1Δ
				0-5 RLS	0	0	0	0		0	0	0	0.00588235		0	0	0	0		0	0	0	0		0	0.0027027	0	0
				6-10 RLS	0.002817	0.002119	0.001493	0.001923		0.025117	0.022491	0.0191209	0.0336798		0	0	0.004545	0		0	0	0	0		0.00571545	0	0.008422	0.008971
				11-15 RLS	0.003246	0.007913	0.011725	0.007976		0.038889	0.015385	0	0.025		0	0	0	0		0	0	0	0		0.0360654	0.0533747	0.029618	0.021491
				16-20 RLS	0.019043	0.022872	0.016867	0.008546							0.00769231	0	0.006452	0.005882		0.006667	0	0	0		0.02	0.0342857	0.0669	0.036111
				21-25	0.017191	0.035435	0.034306	0.010283							0	0.00980392	0	0.009091		0	0.013333	0	0
						Figure 3B
							Replicative divisions
							Wt	sir2Δ	fob1Δ	sgf73Δ	mlp1Δ
							6	3	25	26	4
							6	5	5	15	5
							6	5	5	33	5
							7	6	6	29	6
							7	6	6	15	6
							8	6	7	23	6
							8	6	7	24	6
							9	6	8	17	6
							9	6	8	12	7
							11	7	9	17	7
							11	7	9	18	7
							12	7	9	34	8
							12	7	9	32	8
							12	7	9	31	8
							12	8	10	23	8
							13	8	10	35	8
							13	8	10	19	8
							13	8	10	26	9
							13	8	10	20	9
							14	8	10	22	9
							14	9	10	37	9
							14	9	11	24	9
							14	9	11	26	9
							14	9	12	35	9
							14	9	12	26	9
							15	9	12	24	9
							15	9	13	22	9
							15	10	14	31	9
							15	10	14	25	9
							15	10	15	34	10
							15	10	15	39	10
							16	10	15	30	10
							16	10	15	29	10
							16	10	16	15	10
							16	10	16	34	10
							16	10	16	29	10
							16	11	16	30	10
							16	11	16	28	10
							17	11	17	38	10
							17	11	18	31	10
							17	11	18	21	10
							17	11	18	37	10
							17	11	18	24	10
							17	11	18	16	10
							17	11	18	18	10
							17	11	18	13	11
							17	11	19	20	11
							18	11	19	30	11
							18	12	19	28	11
							18	12	19	17	11
							18	12	20	34	11
							18	12	20	36	11
							18	12	20	23	11
							18	12	20	23	11
							19	12	20	30	11
							19	12	20	24	11
							19	12	20	19	11
							19	12	21	24	11
							19	13	21	35	11
							20	13	22	28	11
							20	13	22	21	11
							20	13	22	35	11
							20	13	23	20	11
							20	13	23	25	11
							20	13	23	22	11
							20	13	23	40	11
							20	13	24	36	11
							20	13	24	29	11
							20	14	24	31	11
							20	14	24	23	11
							20	14	24	30	11
							20	14	24	37	12
							20	14	25	35	12
							20	14	25	24	12
							20	14	25	28	12
							21	14	25	36	12
							21	14	26	31	12
							21	15	26	34	12
							21	15	26	32	12
							21	15	26	33	12
							21	15	26	33	12
							21	16	27	30	12
							21	16	27	18	12
							21	16	27	34	12
							21	16	27	17	12
							22	16	27	29	12
							22	16	27	26	12
							22	16	28	19	12
							22	16	28	25	12
							22	17	28	30	12
							22	17	28	33	12
							22	17	29	13	12
							22	17	29	31	12
							23	18	30	36	12
							23	18	30	35	12
							23	18	30	27	12
							23	18	30	25	12
							23	20	30	38	12
							23	20	30	33	12
							23	20	30	35	12
							23	20	31	31	13
							23	21	31	24	13
							24	21	31	16	13
							24	21	31	30	13
							24		32	28	13
							24		33	20	13
							24		33	28	13
							24		34	25	13
							25		34	39	13
							25		34	32	13
							25		35	24	13
							25		35	27	13
							26		35	37	13
							27		36	32	13
							27		36	38	13
							27		36	35	13
							27		36	24	13
							28		37	34	13
							28		37	36	13
							28		37	37	13
							28		38	22	13
							29		38	18	13
							29		39	33	13
							29		40	34	13
							32		40	35	13
							32		40	32	13
							32		41	34	13
										37	13
										25	13
										21	13
										31	13
										20	13
										13	13
										38	14
										33	14
										27	14
										35	14
										36	14
										14	14
										33	14
										35	14
										16	14
											14
											14
											14
											14
											14
											14
											14
											14
											14
											14
											14
											14
											14
											14
											14
											14
											14
											14
											14
											14
											14
											14
											14
											14
											14
											14
											14
											14
											14
											15
											15
											15
											15
											15
											15
											15
											15
											15
											15
											15
											15
											15
											15
											15
											15
											15
											15
											15
											15
											15
											15
											15
											15
											15
											15
											16
											16
											16
											16
											16
											16
											16
											16
											16
											16
											16
											16
											16
											16
											16
											16
											16
											16
											16
											16
											16
											16
											16
											16
											16
											16
											16
											16
											17
											17
											17
											17
											17
											17
											17
											17
											17
											17
											17
											17
											17
											17
											17
											17
											17
											17
											17
											17
											17
											17
											17
											18
											18
											18
											18
											18
											18
											18
											18
											18
											18
											18
											18
											18
											18
											18
											18
											18
											19
											19
											19
											19
											19
											19
											19
											19
											19
											19
											20
											20
											20
											20
											20
											20
											20
											20
											20
											21
											21
											21
											21
											21
											21
											21
											21
											21
											21
											22
											22
											22
											22
											22
											23
											23
											23

## Sheet: Figure3-supplement1
	Fig S3A							Fig S3B
			Replicative divisions
		wt(962)	mad1Δ	mad2Δ	wt(18619)			Chr II n=1800	GLC7-Δi Chr II n=450	Chr IV n=700	GLC7-Δi Chr IV n=300	Ubi-GFP Plasmid n=350	GLC7-Δi Ubi-GFP Plasmid n=350
		21	18	25	25			0.0869	0.032	0.032	0.031746	0.244	0.155
		29	31	21	21			0.065	0.073171	0.14	0	0.11	0.069
		17	36	30	37			0.09	0	0.12	0	0.26	0.189
		24	20	12	29			0.02	0.042553	0.04	0.015152	0.283	0.229
		28	20	14	43			0.147	0.022222	0.0740741	0.030303	0.288	0.148
		27	22	41	27			0.121	0.039216	0.0545455	0.014925	0.175	0.15
		7	34	13	9			0.071	0.022	0.06
		31	33	20	29			0.09	0.011	0.0606061
		29	32	36	19			0.0444	0.01	0.0757576
		25	17	8	5			0.071		0.0294118
		14	35	6	24			0.085		0.117647
		18	17	30	42			0.125		0.125
		33	20	25	34			0.106		0.1875
		25	13	32	18			0.03		0.158537
		29	35	24	11			0.14
		30	12	21	36			0.12
		27	23	25	19			0.04
		26	30	8	15			0.047
		28	30	25	7			0.086
		20	31	27	31			0.074
		16	20	17	33			0.06
		22	5	30	6			0.021277
		28	37	15	18			0
		19	18	18	28			0.047
		8	14	24	19			0.086
		19	38	27	20			0.074
		12	12	19	15			0.086957
		22	24	9	11			0.073171
		16	18	16	40			0.12
		21	40	38	26			0.075472
		27	10	29	18			0.051724
		27	35	21	31			0.163636
		31	34	26	27			0.09434
		18	31	17	26			0.096154
		25	37	28	16			0.111111
		33	30	19	5			0.08
		16	32	6	20
		28	15	36	17
		26	17	31	30
		28	14	32	29
		29	8	26	38
		7	24	26	22
		13	26	33	31
		30	18	18	22
		15	7	25	21
		25	14	30	9
		13	8	22	17
		28	22	25	18
		22	38	45	26
		26	16	15	22
		27	39	12	18
		28	30	33	14
		11	36	13	33
		24	37	27	30
		25	22	28	29
					48
					31
					33
					45
					18
					32
					34
					5
					11
					17
					34
					12
					41
					33
					33
					50
					6
					35
					22
					28
					12
					26
					22
					14
					30
					14
					23
					15
					46
					13
					23
					7
					28
					21
					11
					40
					36
					11
					23
					30
					31
					14
					27
					32
					12

## Sheet: Figure 4
																						Figure 4C
	Figure 4B
		0h						12h						24h								wt	GLC7-Δi	3X-Δi	wt	GLC7-Δi	3X-Δi
	Wt	0	0	0	0	0	0	0	0.020408	0	0.046154	0.03125	0.015385	0.086957	0.073171	0.12	0.075472	0.051724	0.163636			0	0	0	0.05	0.025	0.025
	MCM21-Δi NBL1-Δi	0	0	0	0	0	0	0	0.02	0	0	0.02	0	0.063	0.0869	0.0869	0.0416	0.0638	0.117			0	0	0	0.05	0	0
	GLC7-Δi	0	0	0	0	0	0	0	0	0	0.016667	0	0	0.032	0.073171	0	0.042553	0.022222	0.039216			0	0	0	0.1	0.075	0.025
	3xΔi	0	0	0	0	0	0	0	0	0	0	0	0	0.021277	0	0.022222	0.039216	0	0			0	0	0	0.125	0	0.05
	TUB1-Δi TUB3-Δi	0	0	0	0			0.02	0	0.02	0			0.119	0.041	0.145	0.093					0	0	0	0.1	0.036	0
																								0			0
		Figure 4D
				Replicative divisions
				16683 wt	16682 Δi Glc7	16857 Δi Glc7+ ΔiNbl1	16858 Δi Glc7+ ΔiMcm21	16869 Δi Glc7+ ΔiMcm21+ ΔiNbl1
				1	7	3	2	21
				1	8	5	3	19
				1	10	7	3	14
				3	10	7	8	19
				7	10	7	8	19
				7	13	8	10	7
				9	13	10	10	18
				10	13	12	11	12
				11	14	12	12	13
				11	14	12	12	8
				11	15	12	12	21
				11	16	13	13	23
				11	16	13	14	21
				12	16	13	14	19
				12	16	14	15	17
				13	16	15	15	19
				13	16	15	15	15
				13	16	16	15	17
				13	16	16	15	12
				13	17	16	16	13
				13	17	16	16	21
				14	17	16	16	38
				14	17	17	16	24
				14	17	17	16	33
				14	17	17	16	36
				14	17	18	16	20
				14	17	18	16	15
				15	17	18	16	17
				15	17	18	16	18
				15	18	18	17	17
				15	18	18	17	20
				15	18	19	17	20
				15	18	19	17	21
				15	18	19	17	12
				15	18	19	18	17
				15	18	19	18	19
				15	18	19	18	13
				15	18	19	18	20
				16	18	19	18	18
				16	18	19	18	22
				16	19	20	18	23
				16	19	20	19	20
				16	19	20	19	12
				16	19	20	19	17
				16	19	20	19	16
				17	19	20	19	17
				17	19	20	20	27
				17	19	20	20	13
				17	19	20	20	22
				17	19	20	20	26
				17	19	20	20	19
				17	20	21	20	16
				17	20	21	20	17
				17	20	21	21	17
				17	20	21	21	16
				17	20	21	21	19
				18	20	21	21	17
				18	20	22	21	18
				18	20	22	21	6
				18	21	22	22	22
				18	21	22	22	36
				18	21	22	22	33
				18	21	22	22	17
				18	21	23	22	29
				18	21	23	22	16
				18	21	23	22	28
				18	22	23	23	37
				19	22	23	23	18
				19	22	25	23	26
				19	22	25	23	18
				19	22	25	23	14
				19	22	25	23	18
				20	22	25	24	9
				20	23	26	24	17
				20	23	26	24	25
				20	23	26	25	27
				20	23	26	25	18
				20	23	26	26	21
				20	24	26	26	24
				21	24	26	26	19
				21	24	27	26	18
				21	24	27	27	24
				21	24	27	27	19
				21	24	27	27	18
				22	24	27	27	27
				22	25	28	28	17
				22	25	28	28	24
				23	26	28	28	29
				24	26	28	28	25
				24	26	28	29	28
				25	26	28	29	31
				25	27	29	30	22
				25	27	29	30	16
				25	29	30	31	21
				25	30	30	37	25
				26	30	31	16	14
				29	33	31	23	25
				30	14	14	19	23
				31	10	23	12
				15	19	24	17
				6	15	18	16
				21	18	27	18
				13	22	19	22
				15	18	12	19
				18	22	21	20
				14	17	26	20
				13	27	19	13
				9	16	25	16
				21	18	25	30
				11	19	40	17
				17	13	11	22
				13	21	26	14
				13	19	28	24
				18	11	27	5
				23	15	23	16
				19	21	21	24
				6	14	14	13
				12	16	26	20
				15	15	23	14
				7	18	18	21
				18	32	22	15
				21	17	15	38
				17	14	22	22
				13	23	24	12
				12	26	25	26
				11	26	13	15
				13	11	10	7
				18	18	21	15
				16	17	20	20
				12	12	16	15
				6	17	30	19
				13	20	21	21
				17	20	17	17
				11	16	21	20
				18	19	18	20
				16	18	21	19
				17	21	40	9
				11	24	10	19
				20	20	19	47
				8	20	18	20
				16	15	24	21
				20	19	21	13
				23	18	23	18
				28	29	26	18
				18	15	19	23
				9	17	24	9
				19	18	12	18
				14	28	12	15
				21	12	23	16
				23	20	13	15
				7	19	27	10
				18	18	29	19
				13	21	20	12
				21	11	30	12
				20	17	18	18
				19	17	19	35
				29	25	25	12
				14	27	7	16
				18	9	17	20
				16	19	21	15
				12	28	18	15
				27	24	11	25
				5	20	18	22
				22	17	21	12
				16	24	19	10
				14	19	19	21
				20	18	23	23
				13	18	15	27
				12	20	22	19
				9	31	25	24
				11	17	20	21
				6	23		14
				22	26		22
				23	12		36
				12	27		14
				14	22		27
				20	22		26
				17	21		27
				7	23		19
				20	7		19
				19	20		15
				14	17		14
				15	18		25
				18	11		9
				23	22		24
				10	20		20
				6	26		17
				24	13
				20	14
				12	27
				22	19
				8	24
				21	34
				14	20
				18	13
				22

## Sheet: Figure4-figure supplement1
	Fig S4B				Fig S4D
	wt	3xΔi			wt	3xΔi
	18	21			135	150
	15	12			105	90
	18	15			210	135
	15	18			240	105
	21	18			300	120
	18	15			150	375
	15	12			120	165
	18	18			150	165
	21	18			120	225
	15	12			255	150
	15	15			195	120
	21	15			195	150
	24	15			90	105
	15	15			105	90
	12	15			375	135
	15	21			195	105
	15	21			90	105
	12	15			135	135
	18	21			150	105
	18	21			150	120
	15	18			165	210
	15	18			135	270
	12	18			150	165
	15	15			75	105
	18	27			120	120
	18	21			120	90
	15	15			135	195
	21	15			120	135
	18	24			75	150
	15	18			300	150
	18	21			150	120
	18	18			60	150
	15	18			165	225
	21	18			240	135
	18	15			225	300
	18	12			165	135
	15	18			135	150
	24	12			105	165
	18	18			135	135
	21	15			150	210
	24	24			105	135
	15	15			105	150
	18	30			75	135
	21	21			105	150
	15	18			105	375
	15	15			105	120
	15	18			105	225
	21	12			90	105
	18	21			120	90
	15	18			105	90

## Sheet: Figure 5
	Figure 5B					Figure 5C
	wt	3xΔi	mlp1Δ	mlp1Δ 3xΔi			Old SPB						New SPB
	0.00313972	0.01	0.00727	0.00335		mlp1Δ	0.8	0.9	0.78				0.2	0.1	0.22
	0.0017331	0	0.005454	0.0016
	0.00325203	0	0.01054	0.00357
	0	0	0.0098	0.0018
	0	0	0.00667	0.00178
	0.0047	0.0055	0.00645
	0
	Figure 5D
			wt					3xΔi					mlp1Δ					3xΔi mlp1Δ
		0-5 RLS	0	0	0	0		0	0	0	0		0	0.0027027	0	0		0	0	0	0
		6-10 RLS	0.002817	0.002119	0.001493	0.001923		0	0	0	0		0.00571545	0	0.008422	0.008971		0.00350877	0.00298507	0	0
		11-15 RLS	0.003246	0.007913	0.011725	0.007976		0.00206186	0.0019802	0	0.001852		0.0360654	0.0533747	0.029618	0.021491		0.00824916	0.00540541	0.007718	0.004348
		16-20 RLS	0.019043	0.022872	0.016867	0.008546		0.0028169	0	0	0.002353		0.02	0.0342857	0.0669	0.036111		0.00869565	0.0155844	0	0
		21-25	0.017191	0.035435	0.034306	0.010283		0.0121659	0.0125731	0.00465116	0.009057							0	0	0.0105263	0.014286
	Figure 5E		Replicative divisions
		Wt	mlp1Δ	mlp1Δ 3xΔi	3xΔi
		5	4	18	6
		6	5	7	7
		6	5	20	7
		6	6	22	8
		6	6	21	8
		6	6	10	8
		6	6	10	8
		7	6	12	8
		7	7	17	9
		7	7	13	9
		8	7	11	9
		8	8	25	9
		8	8	15	9
		8	8	21	9
		8	8	13	9
		8	8	5	10
		8	8	22	11
		9	9	12	11
		9	9	24	11
		9	9	9	11
		10	9	9	12
		10	9	19	12
		10	9	19	12
		10	9	16	12
		10	9	18	12
		11	9	5	12
		11	9	11	12
		11	9	21	12
		11	9	20	12
		11	10	14	12
		11	10	17	12
		11	10	19	12
		12	10	26	12
		12	10	6	12
		12	10	9	12
		12	10	16	12
		12	10	18	12
		12	10	7	13
		12	10	8	13
		12	10	7	13
		12	10	29	13
		13	10	13	13
		13	10	16	13
		13	10	27	13
		13	10	25	13
		13	11	13	13
		13	11	15	14
		13	11	7	14
		13	11	21	14
		13	11	18	14
		13	11	19	14
		14	11	18	14
		14	11	21	14
		14	11	21	14
		14	11	22	14
		14	11	8	14
		14	11	26	14
		14	11	30	14
		14	11	25	14
		14	11	17	14
		14	11	27	14
		14	11	16	14
		14	11	12	14
		15	11	15	15
		15	11	20	15
		15	11	4	15
		15	11	20	15
		15	11	20	15
		15	11	21	15
		15	11	13	15
		15	11	5	15
		15	12	6	15
		15	12	25	15
		15	12	13	15
		15	12	25	15
		15	12	10	15
		15	12	22	16
		16	12	6	16
		16	12	17	16
		16	12	24	16
		16	12	9	16
		16	12	4	16
		16	12	22	16
		16	12	15	16
		16	12	17	16
		16	12	12	16
		16	12	16	16
		16	12	14	16
		16	12	10	16
		16	12	18	16
		16	12	19	16
		16	12	23	16
		16	12	10	16
		16	12	5	16
		16	12	16	16
		16	12	18	16
		16	12	20	16
		16	12	21	16
		16	12	19	16
		16	12	25	16
		16	13	18	16
		16	13	22	17
		17	13	3	17
		17	13	22	17
		17	13	24	17
		17	13	23	17
		17	13	15	17
		17	13	15	17
		17	13	21	17
		17	13	23	17
		17	13	16	17
		17	13	19	17
		17	13	22	17
		17	13	20	17
		17	13	16	17
		17	13	11	17
		17	13	18	17
		17	13	6	17
		17	13	15	17
		17	13	30	17
		17	13	10	17
		18	13	14	17
		18	13	13	17
		18	13	9	17
		18	13	15	17
		18	13	11	17
		18	13	2	17
		18	13	23	17
		18	13	11	17
		18	13	9	17
		18	13	24	17
		18	13	32	17
		18	13	11	17
		18	14	18	17
		18	14	13	17
		18	14	14	17
		18	14	14	17
		18	14	8	17
		18	14	12	18
		19	14	19	18
		19	14	12	18
		19	14	13	18
		19	14	11	18
		19	14	20	18
		19	14	18	18
		19	14	6	18
		19	14	13	18
		19	14	11	18
		19	14	22	18
		19	14	30	18
		19	14	17	18
		20	14	16	18
		20	14	24	18
		20	14	13	18
		20	14	22	18
		20	14	11	18
		20	14	21	18
		20	14	30	18
		20	14	19	18
		20	14	21	19
		20	14	22	19
		20	14	17	19
		20	14	16	19
		20	14	19	19
		20	14	13	19
		20	14	6	19
		20	14	14	19
		20	14	24	19
		20	14	19	19
		20	14	23	19
		20	14	11	19
		20	15	4	19
		20	15	22	19
		20	15	21	19
		20	15	19	19
		20	15	22	19
		20	15	5	19
		20	15	8	19
		21	15	30	19
		21	15	23	19
		21	15	18	19
		21	15	9	19
		21	15	7	19
		21	15	14	19
		21	15	16	20
		21	15	13	20
		21	15	23	20
		21	15	18	20
		21	15	16	20
		21	15	11	20
		21	15	23	20
		21	15	9	20
		21	15	24	20
		21	15	19	20
		21	15	18	20
		22	15	13	20
		22	15	22	20
		22	16	10	20
		22	16	16	20
		22	16	17	20
		22	16	18	20
		22	16	15	20
		22	16	21	20
		22	16	6	20
		22	16	23	20
		22	16	21	20
		22	16	8	20
		22	16	9	20
		22	16	13	20
		22	16	19	21
		22	16	11	21
		22	16	14	21
		22	16	9	21
		22	16	11	21
		22	16	10	21
		22	16	30	21
		22	16	13	21
		22	16	7	21
		23	16	20	21
		23	16	16	21
		23	16	28	21
		23	16	16	21
		23	16	12	21
		23	16	14	21
		23	16	20	21
		23	17	23	21
		23	17	9	21
		23	17	11	21
		23	17	27	21
		23	17	22	21
		23	17	29	21
		23	17	26	21
		23	17	18	21
		23	17	9	21
		24	17	12	21
		24	17	18	21
		24	17	13	21
		24	17	4	22
		24	17	33	22
		24	17	30	22
		24	17	16	22
		24	17	6	22
		24	17	12	22
		24	17	18	22
		24	17	21	22
		25	17	7	22
		25	17	26	22
		25	17	27	22
		25	18	15	22
		25	18	17	22
		25	18	9	22
		25	18	21	22
		26	18	30	22
		26	18	29	22
		26	18	8	22
		26	18	12	22
		27	18	22	22
		27	18	5	22
		27	18	16	22
		27	18	11	22
		27	18	17	22
		27	18	13	22
		27	18	21	22
		28	18	12	22
		28	18	17	23
		28	19	13	23
		28	19	11	23
		28	19	8	23
		28	19	28	23
		28	19	20	23
		28	19	22	23
		29	19	11	23
		29	19	19	23
		29	19	11	23
		29	19	18	23
		29	20	13	23
		32	20	15	23
		32	20	12	23
		32	20	7	23
		33	20	8	23
			20	12	23
			20	10	23
			20	9	24
			20	17	24
			21	14	24
			21	15	24
			21	24	24
			21	14	24
			21	10	24
			21	18	24
			21	7	24
			21	16	24
			21	14	24
			21	10	24
			22	13	24
			22		24
			22		24
			22		24
			22		24
			23		24
			23		24
			23		24
					24
					24
					24
					24
					24
					24
					24
					24
					24
					24
					24
					24
					24
					24
					24
					24
					24
					25
					25
					25
					25
					25
					25
					25
					25
					25
					25
					25
					25
					25
					25
					25
					25
					25
					25
					25
					25
					25
					25
					25
					25
					25
					25
					25
					26
					26
					26
					26
					26
					26
					26
					26
					26
					26
					26
					26
					26
					26
					26
					26
					26
					26
					26
					26
					26
					26
					26
					26
					26
					26
					26
					26
					27
					27
					27
					27
					27
					27
					27
					27
					27
					27
					27
					27
					27
					27
					27
					27
					27
					27
					27
					27
					27
					27
					27
					27
					27
					27
					27
					27
					27
					27
					27
					28
					28
					28
					28
					28
					28
					28
					28
					28
					28
					28
					28
					28
					28
					29
					29
					29
					29
					29
					29
					29
					29
					29
					29
					29
					29
					29
					29
					30
					30
					30
					30
					30
					30
					30
					30
					30
					30
					30
					30
					30
					30
					30
					31
					31
					31
					31
					32
					32
					32
					32
					32
					32
					32
					32
					32
					32
					33
					33
					33
					34
					35
					38
					39

## Sheet: Figure 6
	Figure 6B										Figure 6C
		Replicative divisions
		Wt	3xΔi	-CEN plasmid	-CEN plasmid 3xΔi							wt					3xΔi					-CEN plasmid					-CEN plasmid 3xΔi
		5	6	19	12						0-5 RLS	0	0	0	0		0	0	0	0		0.00991432	0.00944444	0.00908163	0.020226		0	0	0	0.004348
		6	7	18	8						6-10 RLS	0.002817	0.002119	0.001493	0.001923		0	0	0	0		0.0354277	0.0125	0.0282163	0.00625		0.020757	0.009914	0.014253	0.005128
		6	7	5	6						11-15 RLS	0.003246	0.007913	0.011725	0.007976		0.00206186	0.0019802	0	0.001852		0.0233333	0.0272727	0.0467532	0.0414787		0.028755	0	0.016667	0.017549
		6	8	6	29						16-20 RLS	0.019043	0.022872	0.016867	0.008546		0.0028169	0	0	0.002353							0	0.071765	0	0.018182
		6	8	9	6						21-25	0.017191	0.035435	0.034306	0.010283		0.0121659	0.0125731	0.00465116	0.009057
		6	8	4	8
		6	8	8	15
		7	8	8	25
		7	9	18	5
		7	9	14	13
		8	9	12	11
		8	9	26	18					Figure 6E
		8	9	14	12
		8	9	4	11
		8	9	14	10						wt												3xΔi												sir2Δ												sir2Δ3xΔi
		8	10	5	27					0-5 RLS	0	0	0	0									0	0	0	0									0.005319	0	0.004082	0	0	0	0	0.005882	0.004255	0.013333	0.004082	0.014634	0.015385	0.005128	0.004651
		8	11	4	15					6-10 RLS	0.002817	0.002119	0.001493	0.001923									0	0	0	0									0.048415	0.029181	0.05158	0.012007	0.025117	0.022491	0.019121	0.03368	0.033499	0.004878	0.059345	0.012222	0.028908	0.014583	0.013859
		9	11	15	10					11-15 RLS	0.003246	0.007913	0.011725	0.007976									0.00206186	0.0019802	0	0.001852									0.02	0	0.051111	0.011765	0.038889	0.015385	0	0.025	0.055556	0.051071	0.04	0.047222	0.016667	0.0125	0.016667
		9	11	18	11					16-20 RLS	0.019043	0.022872	0.016867	0.008546									0.0028169	0	0	0.002353
		9	11	4	22					21-25	0.017191	0.035435	0.034306	0.010283									0.0121659	0.0125731	0.00465116	0.009057
		10	12	5	10
		10	12	4	15
		10	12	8	8
		10	12	13	9					Figure 6D
		10	12	13	37
		11	12	17	22						Replicative divisions
		11	12	4	25						Wt	sir2Δ	sir2Δ 3xΔi	3xΔi
		11	12	4	7						6	15	8	6
		11	12	5	23						6	7	15	7
		11	12	10	26						6	3	6	7
		11	12	22	22						7	3	8	8
		11	12	9	27						7	12	8	8
		12	12	13	22						8	5	12	8
		12	12	10	24						8	6	10	8
		12	12	15	13						9	10	10	8
		12	12	17	5						9	10	13	9
		12	12	12	17						11	8	5	9
		12	13	6	27						11	16	6	9
		12	13	13	7						12	12	8	9
		12	13	10	30						12	14	12	9
		12	13	7	16						12	16	12	9
		13	13	17	16						12	5	9	9
		13	13	9	17						13	10	13	10
		13	13	22	23						13	11	12	11
		13	13	6	8						13	6	10	11
		13	13	6	18						13	11	10	11
		13	14	6	19						14	6	21	11
		13	14	12	7						14	11	6	12
		13	14	10	15						14	13	8	12
		13	14	5	15						14	13	14	12
		13	14	16	12						14	6	6	12
		14	14	16	6						14	5	10	12
		14	14	11	16						15	6	14	12
		14	14	6	19						15	8	10	12
		14	14	6	15						15	10	11	12
		14	14	15	28						15	13	22	12
		14	14	16	14						15	16	6	12
		14	14	6	13						15	14	5	12
		14	14	14	14						16	14	10	12
		14	14	15	20						16	8	15	12
		14	14	15	9						16	6	15	12
		14	14	11	6						16	18	9	12
		14	14	13	13						16	4	11	12
		15	15	17	17						16	6	18	12
		15	15	9	18						16	4	8	13
		15	15	6	13						17	6	7	13
		15	15	7	19						17	21	17	13
		15	15	6	24						17	6	10	13
		15	15	18	11						17	3	12	13
		15	15	7	30						17	10	8	13
		15	15	12	7						17	6	11	13
		15	15	6	11						17	12	15	13
		15	15	13	19						17	10	17	13
		15	15	9	10						17	10	11	14
		15	15	11	17						18	11	15	14
		15	15	4	5						18	6	14	14
		15	16	15	23						18	13	18	14
		16	16	4	26						18	5	14	14
		16	16	4	15						18	6	18	14
		16	16	4	4						18	11	10	14
		16	16	16	19						18	5	5	14
		16	16	5	22						19	9	10	14
		16	16	7	16						19	11	8	14
		16	16	27	6						19	5	14	14
		16	16	9	6						19	8	12	14
		16	16	20	11						19	13	10	14
		16	16	22	28						20	19	14	14
		16	16	7	21						20	9	12	14
		16	16	4	10						20	12	9	14
		16	16	6	10						20	9	10	14
		16	16	6	19						20	11	9	15
		16	16	16	8						20	6	11	15
		16	16	5	16						20	12	8	15
		16	16	13	19						20	11	6	15
		16	16	7	5						20	11	4	15
		16	16	7	10						20	10	13	15
		16	16	13	20						20	5	15	15
		16	16	5	10						20	7	18	15
		16	16	14	12						20	17	13	15
		16	16	20	20						20	8	14	15
		16	16	5	13						20	10	13	15
		16	17	9	14						20	18	8	15
		17	17	9	21						21	15	10	15
		17	17	10	7						21	10	5	16
		17	17	5	12						21	16	5	16
		17	17	3	17						21	19	6	16
		17	17	17	13						21	11	12	16
		17	17	5	12						21	11	10	16
		17	17	6	33						21	13	12	16
		17	17	10	17						21	14	8	16
		17	17	9	23						21	14	12	16
		17	17	6	13						21	11	11	16
		17	17	6	12						22	12	4	16
		17	17	5	13						22	14	7	16
		17	17	7	17						22	5	13	16
		17	17	10	10						22	8	11	16
		17	17	14	16						22	12	10	16
		17	17	11	10						22	13	8	16
		17	17	5	13						22	12	9	16
		17	17	12	23						22	13	13	16
		17	17	7	26						23	8	10	16
		18	17	12	11						23	11	16	16
		18	17	17	8						23	14	9	16
		18	17	9	24						23	9	9	16
		18	17	6	16						23	15	13	16
		18	17	4	13						23	7	10	16
		18	17	5	26						23	14	14	16
		18	17	12	17						23	6	7	16
		18	17	14	24						23	6	10	17
		18	17	11	25						24	13	8	17
		18	17	12	7						24	11	11	17
		18	17	21	7						24	6	13	17
		18	17	16	15						24	5	15	17
		18	17	4	30						24	7	7	17
		18	17	12	31						24	8	11	17
		18	17	11	21						25	7	9	17
		18	17	7	6						25	15	12	17
		18	17	14	10						25	4	10	17
		18	18	17	16						25	6	14	17
		19	18	9	21						26	12	18	17
		19	18	8	9						27	5	9	17
		19	18	13	15						27	8	15	17
		19	18	5	27						27	6	11	17
		19	18	20	21						27	5	9	17
		19	18	8	9						28	6	14	17
		19	18	12	10						28	16	13	17
		19	18	15	15						28	7	7	17
		19	18	6	21						28	10	19	17
		19	18	9	7						29	10	5	17
		19	18	6	27						29	9	13	17
		19	18	5	8						29	6	13	17
		20	18	19	24						32	7	9	17
		20	18	6	23						32	10	15	17
		20	18	21	10						32	13	9	17
		20	18	5	11							12	7	17
		20	18	8	18							11	10	17
		20	18	7	20							8	10	17
		20	18	5	14							14	10	17
		20	18	14	23							12	11	17
		20	19	19	5							11	12	17
		20	19	20	11							8	16	17
		20	19	11	26							12	8	17
		20	19	10	9							6	13	17
		20	19	20	15							7	14	17
		20	19	13	17							11	14	17
		20	19	23	16							5	15	18
		20	19	3	24							13	10	18
		20	19	4	10							12	15	18
		20	19	15	16							10	19	18
		20	19	16	17							5	11	18
		20	19	12	4							15	20	18
		20	19	4	8							5	14	18
		20	19	7	11							6	15	18
		20	19	7	5							11	21	18
		20	19	4	15							10	16	18
		20	19	20	30							5	6	18
		20	19	12	7							8	8	18
		20	19	22	5							11	5	18
		21	19	3	23							11	13	18
		21	19	11	20							10	16	18
		21	19	14	17							8	5	18
		21	19	5	8							8	9	18
		21	19	16	17							10	16	18
		21	19	3	7							10	12	18
		21	20	4	24							8	8	18
		21	20	4	20							11	12	18
		21	20	14	20							8	11	19
		21	20	22	19							8	14	19
		21	20	4	34							13	7	19
		21	20	14	16							12	19	19
		21	20	7	6							12	11	19
		21	20	16	15							13	12	19
		21	20	6	22							11	6	19
		21	20	6	12							16	17	19
		21	20	14	12							15	12	19
		22	20	4	13							5	14	19
		22	20	12	9							14	13	19
		22	20	9	17							6	8	19
		22	20	15	7							8	8	19
		22	20		24							14	8	19
		22	20									10	10	19
		22	20									10	10	19
		22	20									13	9	19
		22	20									5	11	19
		22	20									10	12	19
		22	20									11	11	19
		22	20									6	16	19
		22	20									13	14	19
		22	20									6	15	19
		22	21									10	10	19
		22	21									5	9	19
		22	21									12	12	20
		22	21									11	11	20
		22	21									5	11	20
		22	21									10	13	20
		22	21									12	13	20
		22	21									13	10	20
		22	21									9	14	20
		23	21									5	15	20
		23	21									6	11	20
		23	21									12	15	20
		23	21									5	12	20
		23	21									12	11	20
		23	21									6	17	20
		23	21											20
		23	21											20
		23	21											20
		23	21											20
		23	21											20
		23	21											20
		23	21											20
		23	21											20
		23	21											20
		23	21											20
		24	21											20
		24	21											20
		24	21											21
		24	22											21
		24	22											21
		24	22											21
		24	22											21
		24	22											21
		24	22											21
		24	22											21
		24	22											21
		25	22											21
		25	22											21
		25	22											21
		25	22											21
		25	22											21
		25	22											21
		25	22											21
		26	22											21
		26	22											21
		26	22											21
		26	22											21
		27	22											21
		27	22											21
		27	22											21
		27	22											21
		27	22											21
		27	22											21
		27	22											21
		28	22											21
		28	23											22
		28	23											22
		28	23											22
		28	23											22
		28	23											22
		28	23											22
		28	23											22
		29	23											22
		29	23											22
		29	23											22
		29	23											22
		29	23											22
		32	23											22
		32	23											22
		32	23											22
		33	23											22
			23											22
			23											22
			24											22
			24											22
			24											22
			24											22
			24											22
			24											22
			24											22
			24											22
			24											22
			24											23
			24											23
			24											23
			24											23
			24											23
			24											23
			24											23
			24											23
			24											23
			24											23
			24											23
			24											23
			24											23
			24											23
			24											23
			24											23
			24											23
			24											23
			24											24
			24											24
			24											24
			24											24
			24											24
			24											24
			24											24
			24											24
			24											24
			24											24
			25											24
			25											24
			25											24
			25											24
			25											24
			25											24
			25											24
			25											24
			25											24
			25											24
			25											24
			25											24
			25											24
			25											24
			25											24
			25											24
			25											24
			25											24
			25											24
			25											24
			25											24
			25											24
			25											24
			25											24
			25											24
			25											24
			25											24
			26											25
			26											25
			26											25
			26											25
			26											25
			26											25
			26											25
			26											25
			26											25
			26											25
			26											25
			26											25
			26											25
			26											25
			26											25
			26											25
			26											25
			26											25
			26											25
			26											25
			26											25
			26											25
			26											25
			26											25
			26											25
			26											25
			26											25
			26											26
			27											26
			27											26
			27											26
			27											26
			27											26
			27											26
			27											26
			27											26
			27											26
			27											26
			27											26
			27											26
			27											26
			27											26
			27											26
			27											26
			27											26
			27											26
			27											26
			27											26
			27											26
			27											26
			27											26
			27											26
			27											26
			27											26
			27											26
			27											27
			27											27
			27											27
			27											27
			28											27
			28											27
			28											27
			28											27
			28											27
			28											27
			28											27
			28											27
			28											27
			28											27
			28											27
			28											27
			28											27
			28											27
			29											27
			29											27
			29											27
			29											27
			29											27
			29											27
			29											27
			29											27
			29											27
			29											27
			29											27
			29											27
			29											27
			29											28
			30											28
			30											28
			30											28
			30											28
			30											28
			30											28
			30											28
			30											28
			30											28
			30											28
			30											28
			30											28
			30											28
			30											29
			30											29
			31											29
			31											29
			31											29
			31											29
			32											29
			32											29
			32											29
			32											29
			32											29
			32											29
			32											29
			32											29
			32											30
			32											30
			33											30
			33											30
			33											30
			34											30
			35											30
			38											30
			39											30
														30
														30
														30
														30
														30
														30
														31
														31
														31
														31
														32
														32
														32
														32
														32
														32
														32
														32
														32
														32
														33
														33
														33
														34
														35
														38
														39
[truncated: 9 more columns]

[truncated: 3 more sheets: Figure 7, Figure7-figure supplement1, Figure 8]
